# Supplementary material for: Genomics clarifies taxonomic boundaries in a difficult species complex
Source: PubMed Central journal article supplement (PMC5726641; doi:10.1371/journal.pone.0189417), 2017-12-12

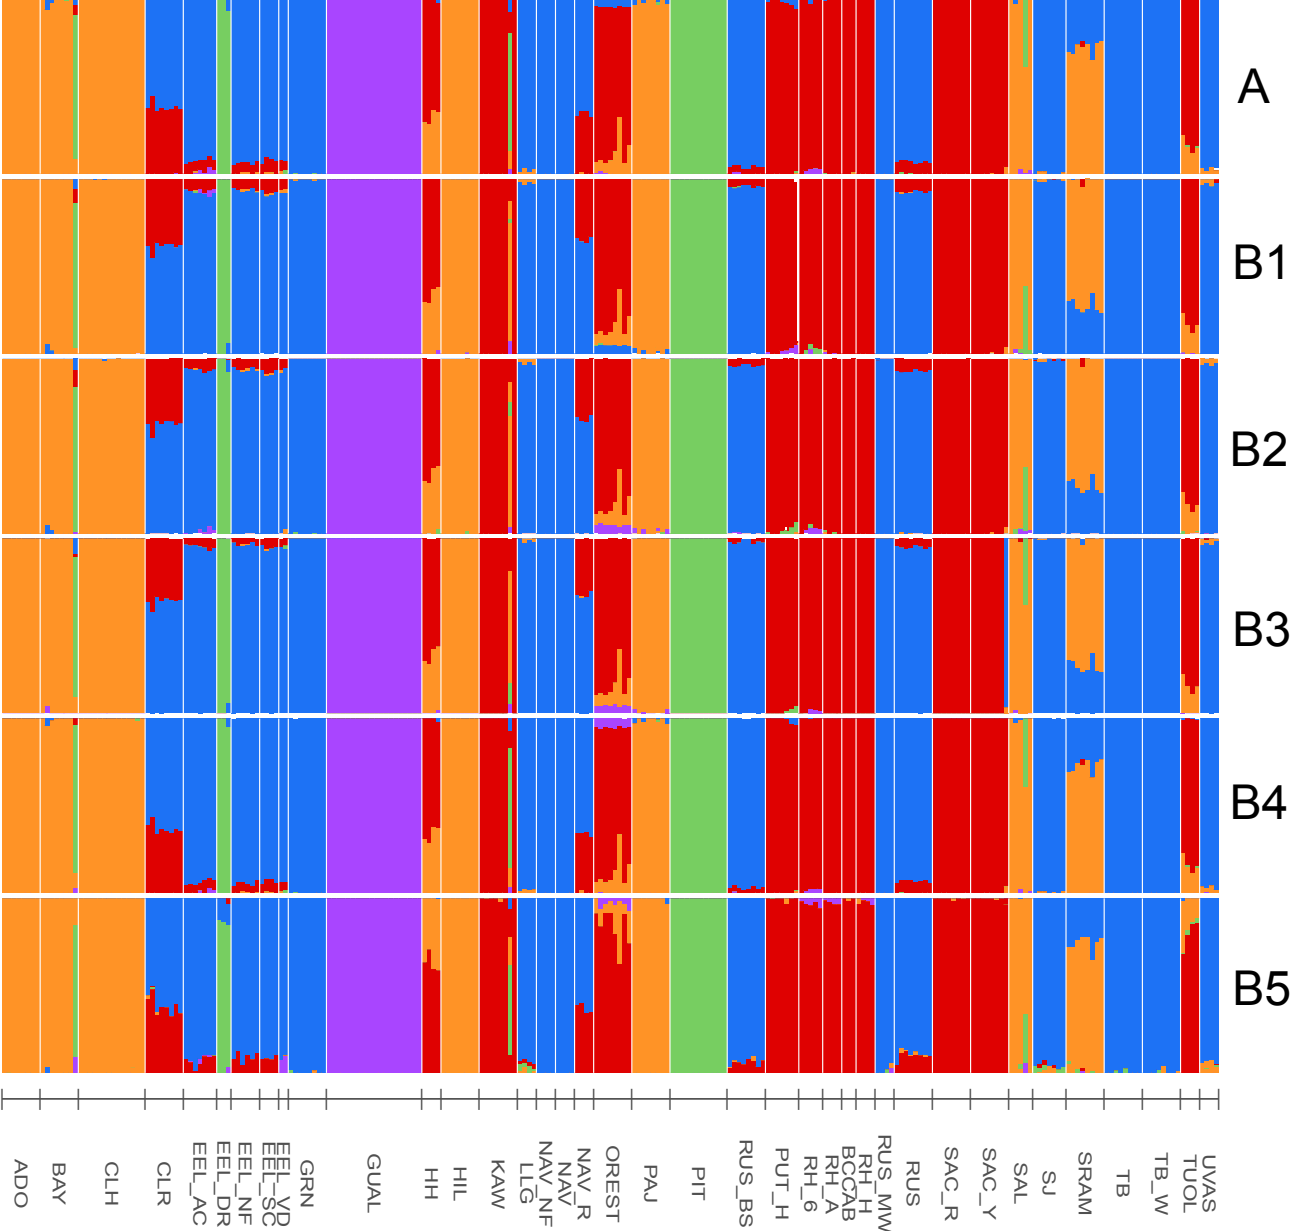

Supplement: pone.0189417.s003.pdf [file pone.0189417.s003.pdf]
