# Supplementary material for: Genomics clarifies taxonomic boundaries in a difficult species complex
Source: PubMed Central journal article supplement (PMC5726641; doi:10.1371/journal.pone.0189417), 2017-12-12
Supplement: pone.0189417.s005.pdf [file pone.0189417.s005.pdf]

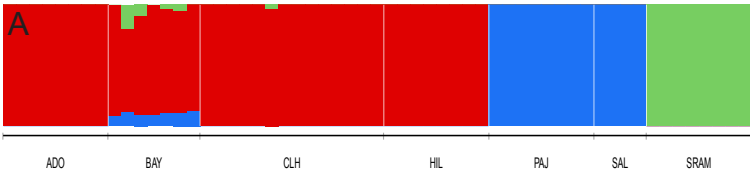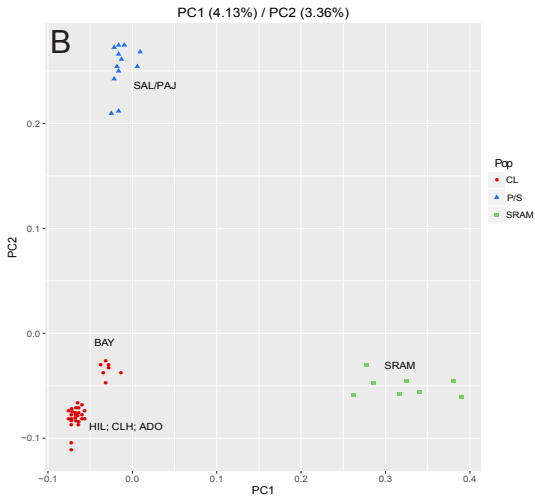

**C**

| $F_{st}$ | P/S   | SRAM  |
|----------|-------|-------|
| CL       | 0.072 | 0.133 |
| P/S      |       | 0.140 |
