# Supplementary material for: Genomics clarifies taxonomic boundaries in a difficult species complex
Source: PubMed Central journal article supplement (PMC5726641; doi:10.1371/journal.pone.0189417), 2017-12-12
Supplement: pone.0189417.s006.pdf [file pone.0189417.s006.pdf]

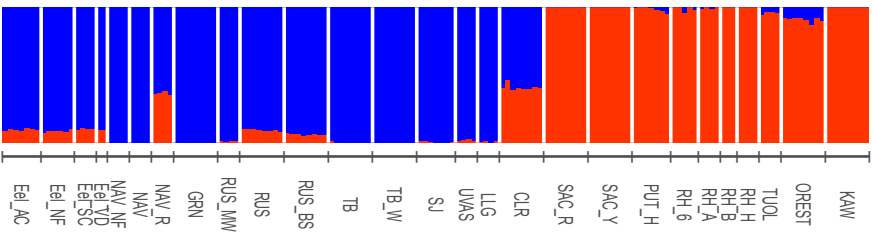

All  
Roach  
Samples

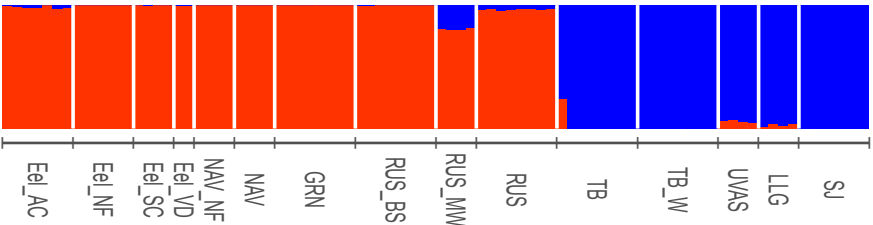

All  
Coastal

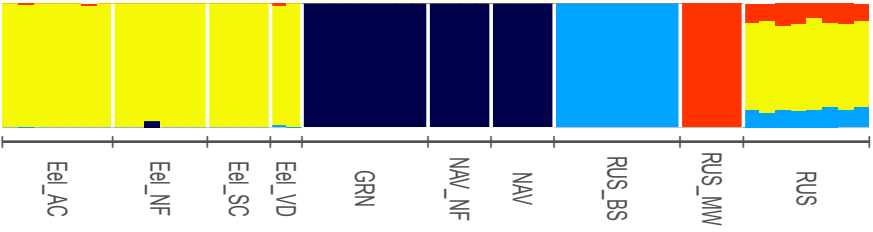

All  
Northern  
Coastal

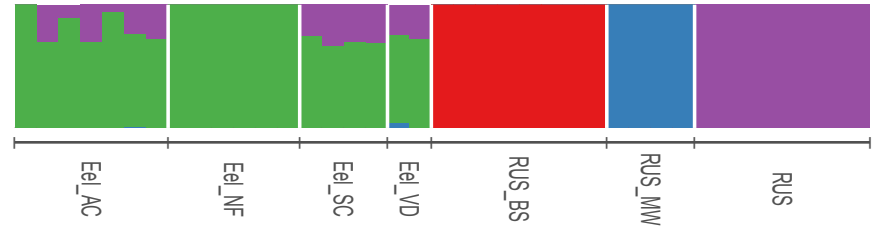

Eel vs.  
Russian

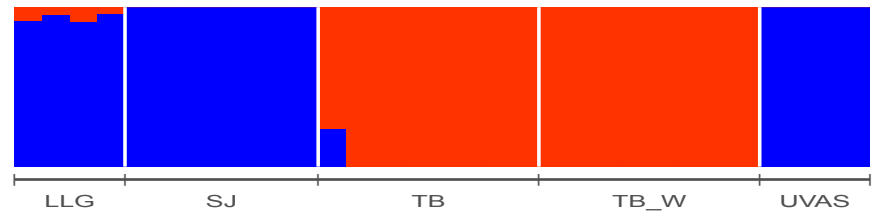

All  
Southern  
Coastal

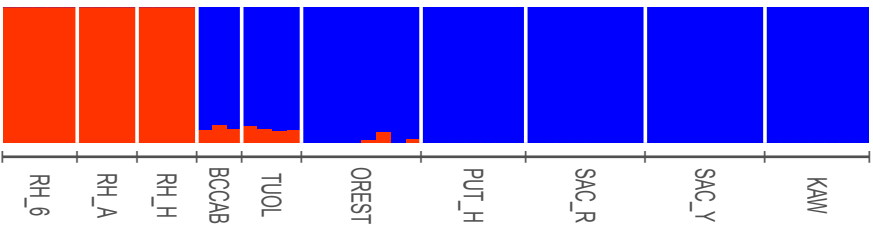

All  
Inland

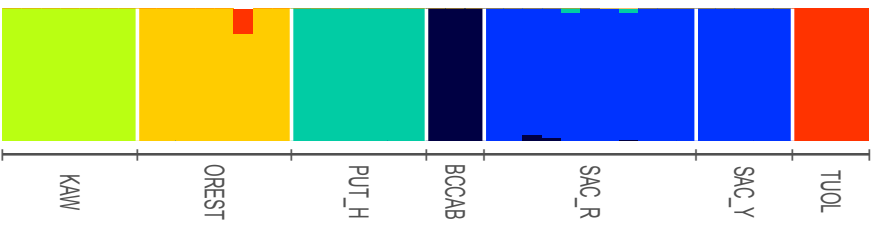

Inland  
w/out Red  
Hills

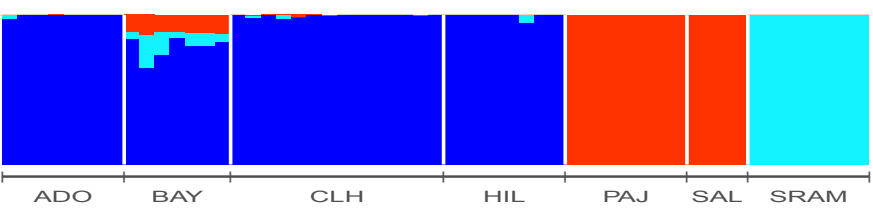

All  
Hitch
